# Supplementary material for: Nationwide Multicenter Study for Overlaps of Common Functional Gastrointestinal Disorders in Korean Patients With Constipation
Source: PubMed Central journal article supplement — J Neurogastroenterol Motil. 2017 Oct 30;23(4):569–77. doi: 10.5056/jnm17033 (PMC5628990; doi:10.5056/jnm17033), 2017-10-30
Supplement: jnm-23-569_suppl.pdf [file jnm-23-569_suppl.pdf]

---

**Supplementary Table.** List of the 19 Participating Institutions in Korea

---

- 1) Keimyung University Dongsan Hospital in Daegu
  - 2) Inje University Hospital in Busan
  - 3) Pusan National University Hospital in Busan
  - 4) Seoul National University Hospital in Seoul
  - 5) Dankook University Hospital in Cheonan
  - 6) Jeju National University Hospital in Jeju
  - 7) Daegu Catholic University Hospital in Daegu
  - 8) Wonkwang University Hospital in Iksan
  - 9) Wonkwang University Sanbon Hospital in Gunpo
  - 10) Kyungpook National University Hospital in Daegu
  - 11) Soonchunhyang University Hospital in Seoul
  - 12) Yeungnam University Hospital in Daegu
  - 13) National Medical Center in Seoul
  - 14) Chungnam National University Hospital in Daejeon
  - 15) Hallym University Hospital in Chuncheon
  - 16) Kosin University Hospital in Busan
  - 17) Yonsei University Hospital in Seoul
  - 18) Chonnam National University Hospital in Gwangju
  - 19) Sungkyunkwan University Hospital in Seoul
-
